# Supplementary material for: Female Mice with Selenocysteine tRNA Deletion in Agrp Neurons Maintain Leptin Sensitivity and Resist Weight Gain While on a High-Fat Diet
Source: MDPI journal article supplement (doi:10.3390/ijms222011010), 2021-10-12
Supplement: s1 [file s1]

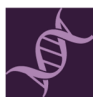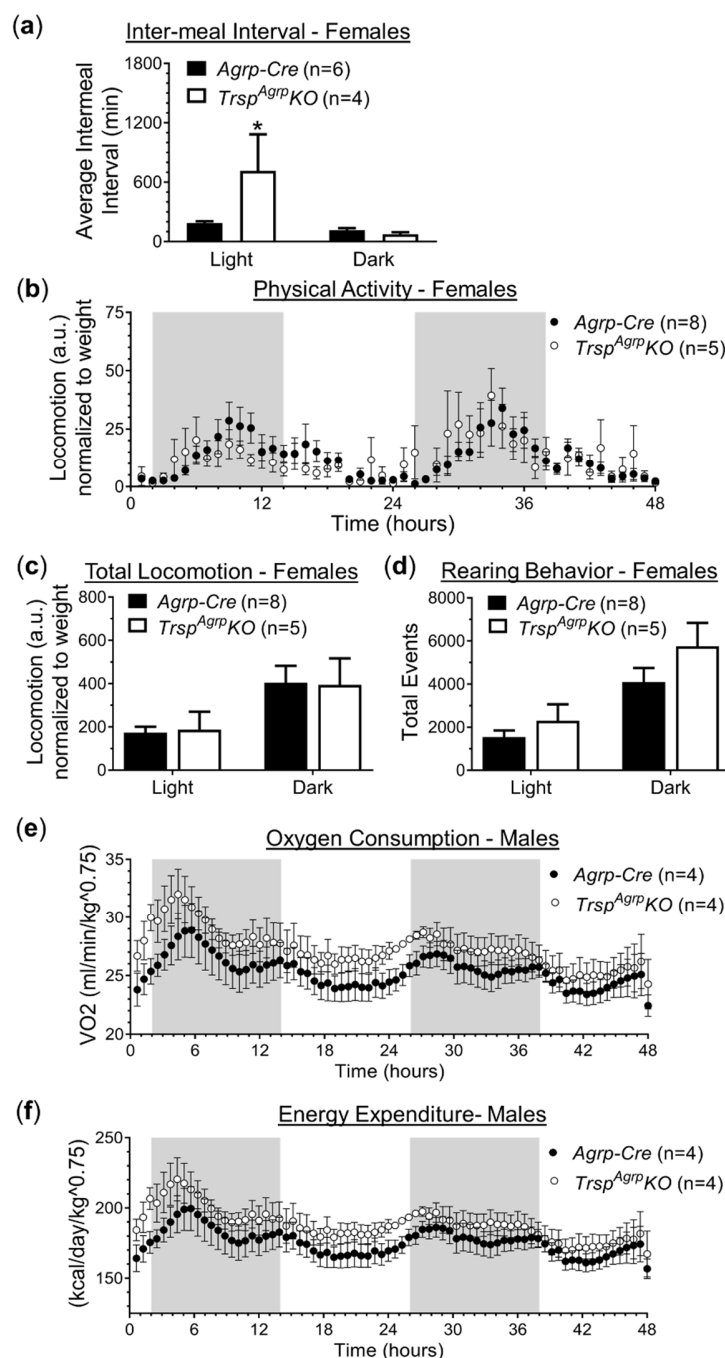

**Figure S1.** Supplementary metabolic cage data for female and male *Trsp<sup>Agrp</sup>KO* mice raised on a high fat diet. Meal analysis of food intake data revealed a significantly higher inter-meal interval in female *Trsp<sup>Agrp</sup>KO* mice compared to *Agrp-Cre* control mice during the light cycle (a) (Two-way repeated measures analysis of variance, followed by Sidak's multiple comparisons test:  $p=0.04$ ). Time-course display of physical activity of female *Trsp<sup>Agrp</sup>KO* mice while in the metabolic cages (b). No significant differences between genotypes were detected in terms of either spontaneous locomotor activity (c) or rearing events between females of both genotypes (d) No significant changes in oxygen



consumption (e) or energy expenditure (f) were observed in male *Trsp<sup>Agrp</sup>KO* mice, although there were slight trends towards an elevation in both parameters. Samples sizes are displayed in the graphs. All values shown are mean  $\pm$  standard error of the mean.

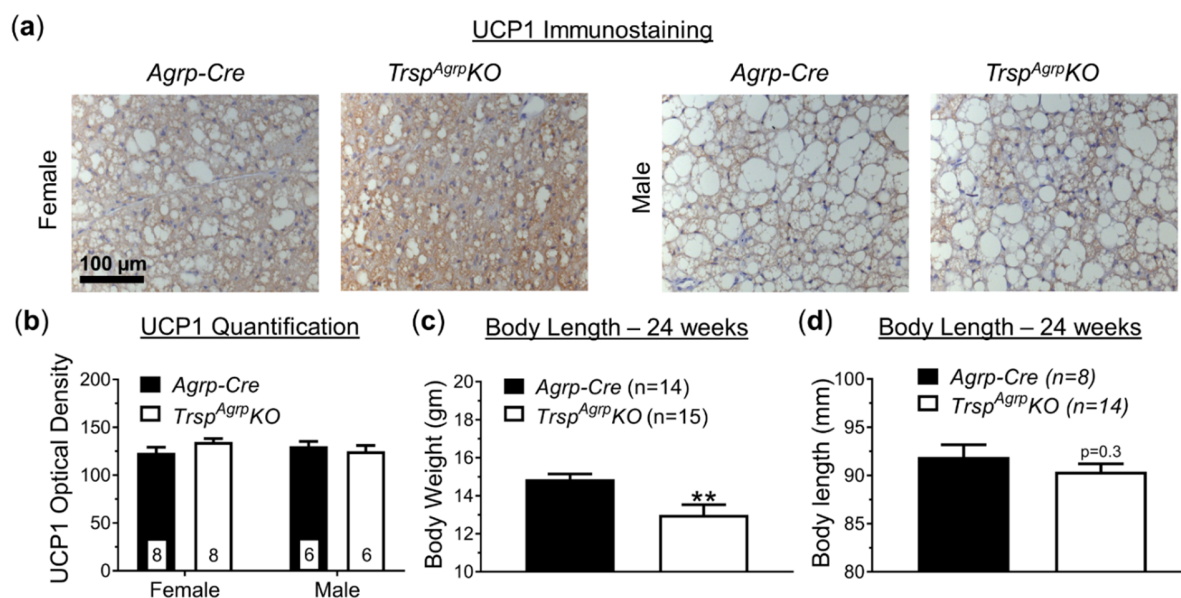

**Figure S2.** Uncoupling protein-1 (UCP1) staining in brown adipose tissue (BAT) sections from *Trsp<sup>Agrp</sup>KO* mice of both sexes raised on a high fat diet and supplemental information about female mouse body composition. Sample images of BAT sections stained for UCP1 immunoreactivity taken at 20 $\times$  magnification. (a,b) Optical density measurements did not reveal any significant change due to either genotype or sex. (c) Female *Trsp<sup>Agrp</sup>KO* mice weighed significantly less than controls at 4 weeks of age (student's test, \*\*  $p = 0.005$ ) (d) and body lengths were comparable at 24 weeks of age (student's test,  $p = 0.3$ ). Samples sizes are displayed in the graphs. All values shown are mean  $\pm$  standard error of the mean.
